# Supplementary material
Source: publisher figshare collection journal article supplement (https://karger.figshare.com/articles/dataset/_/4626193)
Supplement: Supplementary file 1 [file 1]

## Suppl. Fig. S1, Amatngalim et al.

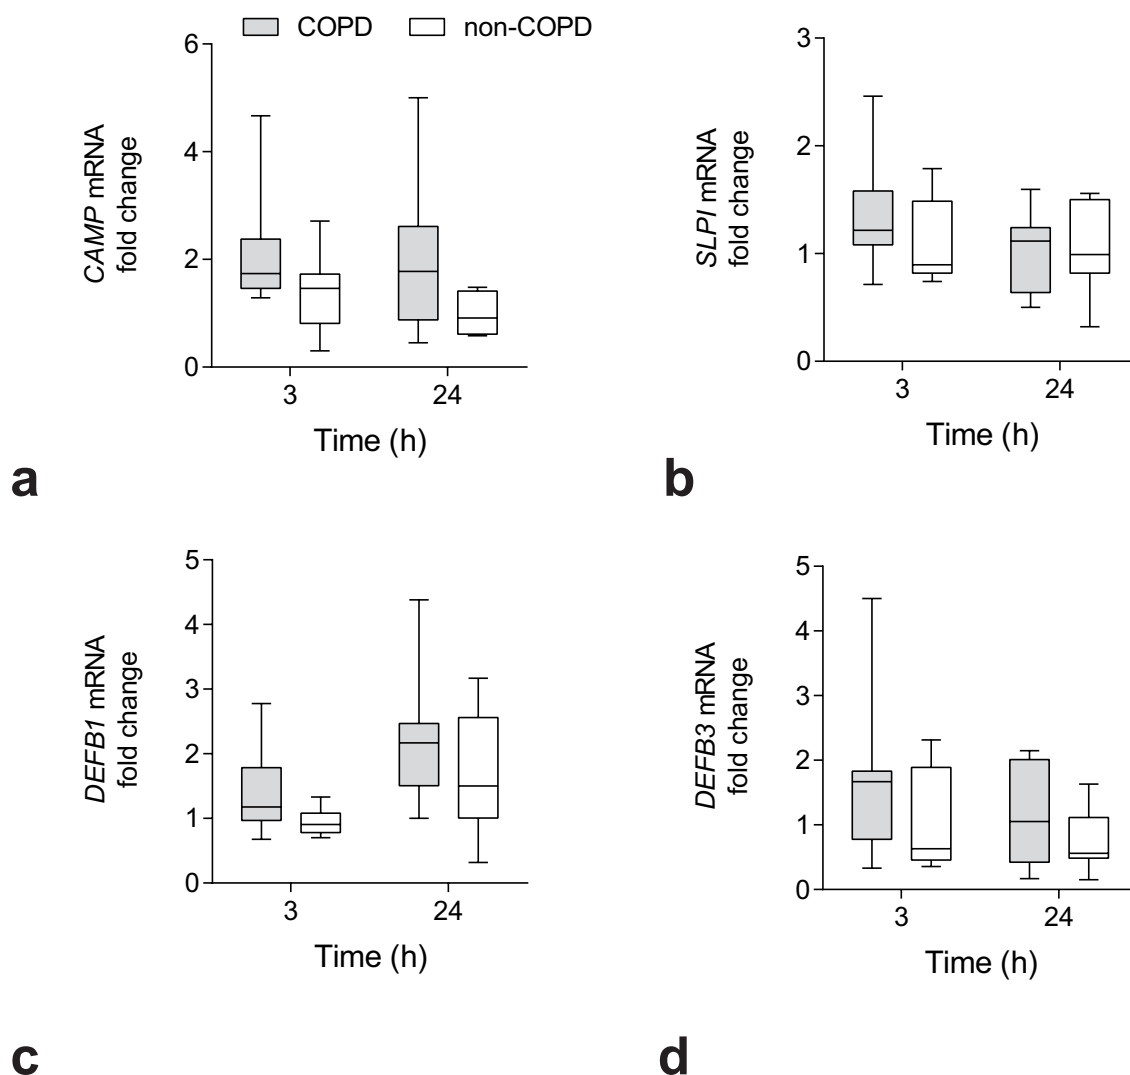

Suppl. Fig. S1. Expression of LL-37/CAMP, SLPI, DEFB1 and DEFB3 in COPD and non-COPD ALI-PBEC. COPD (grey boxplots, n=11 patients) and non-COPD (white boxplots, n=8 patients) ALI-PBEC were stimulated with  $1 \times 10^9$  CFU/ml UV-inactivated NTHi for 3 and 24 hours. mRNA expression of **a** LL-37/CAMP, **b** SLPI, **c** DEFB1 and **d** DEFB3 was assessed by qPCR. Stimulations were performed in duplicates. Data is shown as fold change in mRNA compared to untreated cells. Results are shown as boxplot with whiskers from minimum to maximum or bars (means  $\pm$  SEM). Analysis of differences was conducted with a two-way ANOVA and Bonferroni post-hoc test.
