# Supplementary material
Source: publisher figshare collection journal article supplement (https://karger.figshare.com/articles/dataset/_/4626193)
Supplement: Supplementary file 2 [file 1]

## Suppl. Fig. S3, Amatngalim et al.

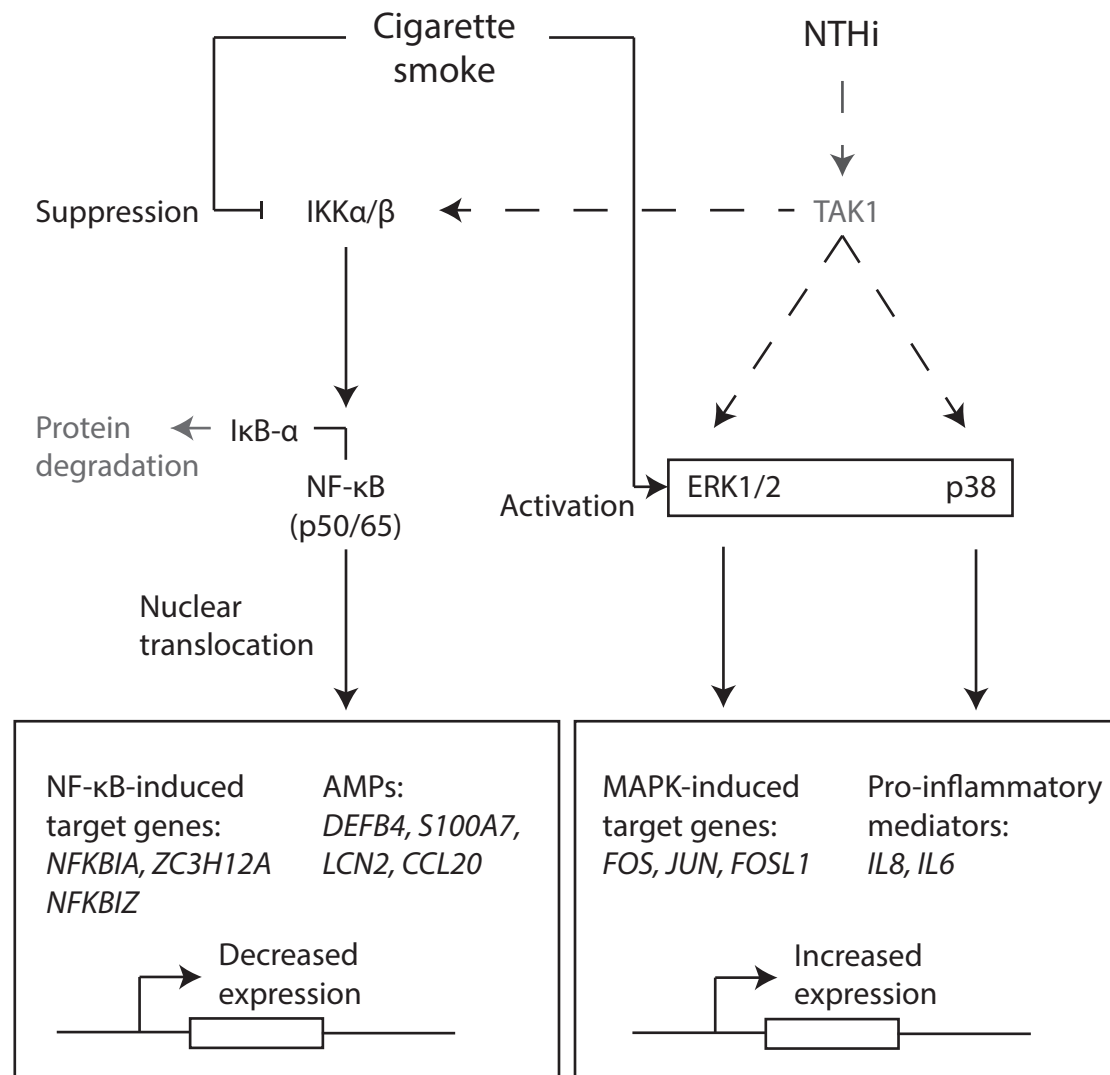

Suppl. Fig. S3. Hypothetical model of the effect of CS on airway epithelial cell innate immunity. NTHi activates both the NF-κB and MAPK signal transduction through the kinase TAK1. Cigarette smoke suppresses IKKα/β phosphorylation, which results in impaired NF-κB transcriptional activity reflected by impaired expression of early-induced target genes (*NFKBIA*, *ZC3H12A*, and *NFKBIZ*) and AMPs. In contrast, CS further enhances activation of the MAP-kinases ERK1/2 and p38, promoting expression of AP-1 transcription factor (*FOS*, *JUN*, and *FOSL1*) and pro-inflammatory mediators.
