# Supplementary material
Source: publisher figshare collection journal article supplement (https://karger.figshare.com/articles/dataset/_/4626193)
Supplement: Supplementary file 3 [file 1]

## Suppl. Fig. S2, Amatngalim et al.

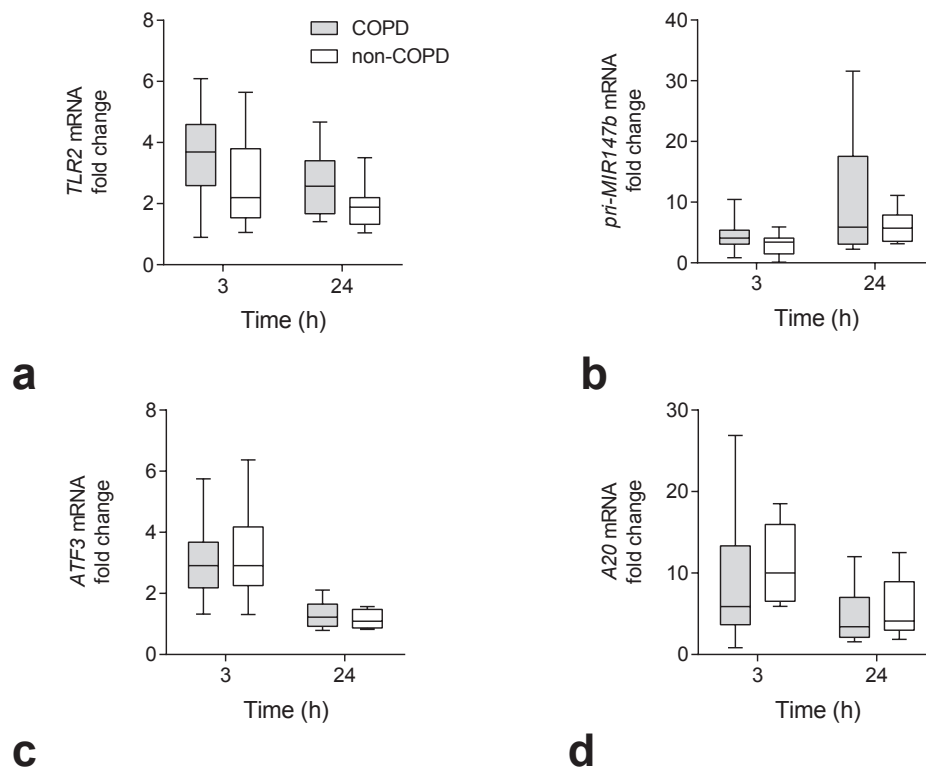

Suppl. Fig. S2. Expression of NTHi-induced innate immune regulators by COPD and non-COPD airway epithelial cells. COPD (grey boxplots, n=11 patients) and non-COPD (white boxplots, n=8 patients) ALI-PBEC were stimulated with  $1 \times 10^9$  CFU/ml UV-inactivated NTHi for 3 and 24 hours. Afterwards, mRNA expression of **a** TLR2, **b** the primary microRNA 147b (pri-mir-147b) transcript, **c** ATF3 and **d** A20 was assessed by qPCR. Stimulations were performed in duplicates. Data is shown as fold change in mRNA compared to untreated cells. All results are shown as boxplot with whiskers from minimum to maximum or bars (means  $\pm$  SEM). Analysis of differences was conducted with a two-way ANOVA and Bonferroni post-hoc test.
