# Supplementary material
Source: publisher figshare collection journal article supplement (https://karger.figshare.com/articles/dataset/_/4626193)
Supplement: Supplementary file 4 [file 1]

Archive with 4 entries (4 files):
- JIN455193_FigS1.pdf
- JIN455193_FigS2.pdf
- JIN455193_FigS3.pdf
- JIN455193_TableS1.docx
