# Supplementary material
Source: publisher figshare collection journal article supplement (https://karger.figshare.com/articles/dataset/_/4626193)
Supplement: Supplementary file 4 [file 1 › JIN455193_TableS1.docx]

**Suppl. Table S1: Top 25 most differentially expressed genes in NTHi stimulated PBEC**

| **Gene**  **Symbol** | **FC NTHi vs UNST**  **( 6 h)** |
| --- | --- |
| ***DEFB4*** | **60.3** |
| ***CCL20*** | **33.0** |
| *PLAT* | 21.3 |
| *BCL2A1* | 20.0 |
| *IL8* | 18.3 |
| *SPRR2C* | 16.2 |
| *LCE3D* | 15.9 |
| *CYP1A1* | 15.7 |
| *IL1R2* | 12.6 |
| *SPRR2G* | 12.1 |
| *C15orf48* | 11.9 |
| *MRGPX3* | 10.5 |
| *MMP9* | 8.5 |
| *TLR2* | 8.3 |
| *IL1F9* | 8.1 |
| *SOD2* | 7.5 |
| *CXCL3* | 7.0 |
| *IL13RA2* | 6.7 |
| *MMP1* | 6.3 |
| ***LCN2*** | **6.0** |
| *MMP10* | 5.9 |
| *ADH7* | -5.3 |
| ***S100A7*** | **5.2** |
| *G0S2* | 5.0 |
| *APOBEC3A* | 5.0 |

| **Gene**  **Symbol** | **FC NTHi vs UNST**  **(24 h)** |
| --- | --- |
| ***DEFB4*** | **110.6** |
| *IL1F9* | 0.3 |
| *SPRR2G* | 37.0 |
| *SPRR2C* | 31.6 |
| *IL8* | 17.2 |
| *RNASE7* | 16.1 |
| *IL1R2* | 14.7 |
| ***CCL20*** | **34** |
| *CYP4B1* | -12.8 |
| *ADH7* | -12.6 |
| ***LCN2*** | **11.9** |
| *IL1RL1* | 11.1 |
| *LCE3D* | 10.8 |
| *KRT15* | -10.7 |
| *DAPL1* | -10.7 |
| *IL13RA2* | 10.6 |
| *MRGPX3* | 10.0 |
| *XDH* | 9.9 |
| *WFDC12* | 9.8 |
| *PPIF* | 9.7 |
| *MMP1* | 9.6 |
| *MMP9* | 8.2 |
| *HMOX1* | 8.2 |
| *SLC16A9* | -8.1 |
| *C15orf48* | 8.1 |

Gene expression analysis by microarray of unstimulated (UNST) and UV-inactivated NTHi stimulated PBEC. Fold change values are shown for the top 25 most differentially expressed genes at 6 h (left table) and 24 h (right table) after stimulation. Selected AMPs that are further analysed are highlighted in bold and grey boxes. PBEC from 6 independent donors were included in the analysis. The criteria for differential expression was an absolute fold change > 2 and p < 0.05, corrected for multiple testing.
